# Supplementary material for: Triazine-phosphine oxide electron transporter for ultralow-voltage-driven sky blue PHOLEDs
Source: Royal Society of Chemistry journal article supplement (doi:10.1039/c4tc02993c), 2015-01-01
Supplement: c4tc02993c1.pdf [file c4tc02993c1.pdf]

## Supporting Information

### Triazole-Phosphine Oxide Electron Transporter for Ultralow-Voltage-Driven Blue PHOLEDs

Jilin Jia,<sup>a</sup> Liping Zhu,<sup>b</sup> Ying Wei,<sup>a,c</sup> Zhongbin Wu,<sup>b</sup> Hui Xu,<sup>\*a,c</sup> Dongxue Ding,<sup>a</sup>  
Runfeng Chen,<sup>\*c</sup> Dongge Ma<sup>\*b</sup> and Wei Huang<sup>c</sup>

<sup>a</sup> Key Laboratory of Functional Inorganic Material Chemistry, Ministry of Education,  
Heilongjiang University, 74 Xuefu Road, Harbin 150080 (P. R. China)

<sup>b</sup> State Key Laboratory of Polymer Physics and Chemistry, Changchun Institute of Applied  
Chemistry, Chinese Academy of Sciences, Changchun 130022 (P.R. China)

<sup>c</sup> Institute of Advanced Materials, Nanjing University of Posts and Telecommunications, 66  
Xinmofan Road, Nanjing 211816 (P.R. China)

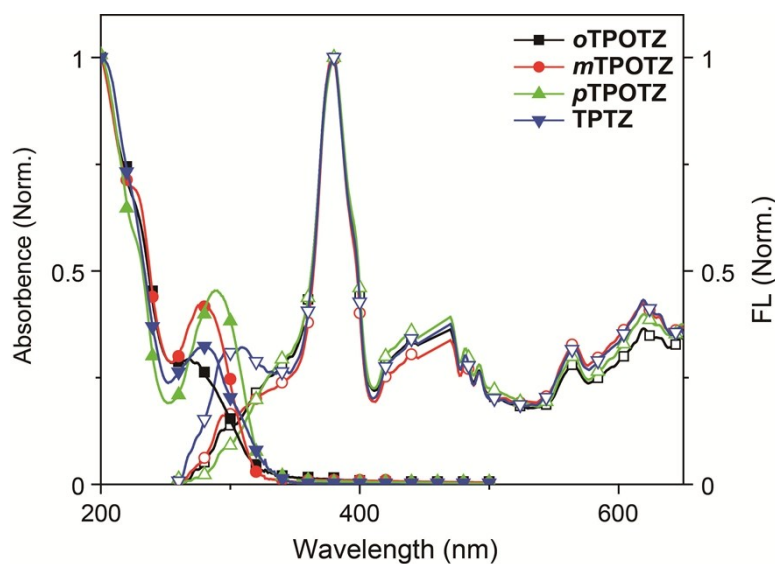

**Figure S1.** Absorption and emission spectra of  $x$ TPOTZ and TPTZ in film measured at room temperature and in atmosphere.

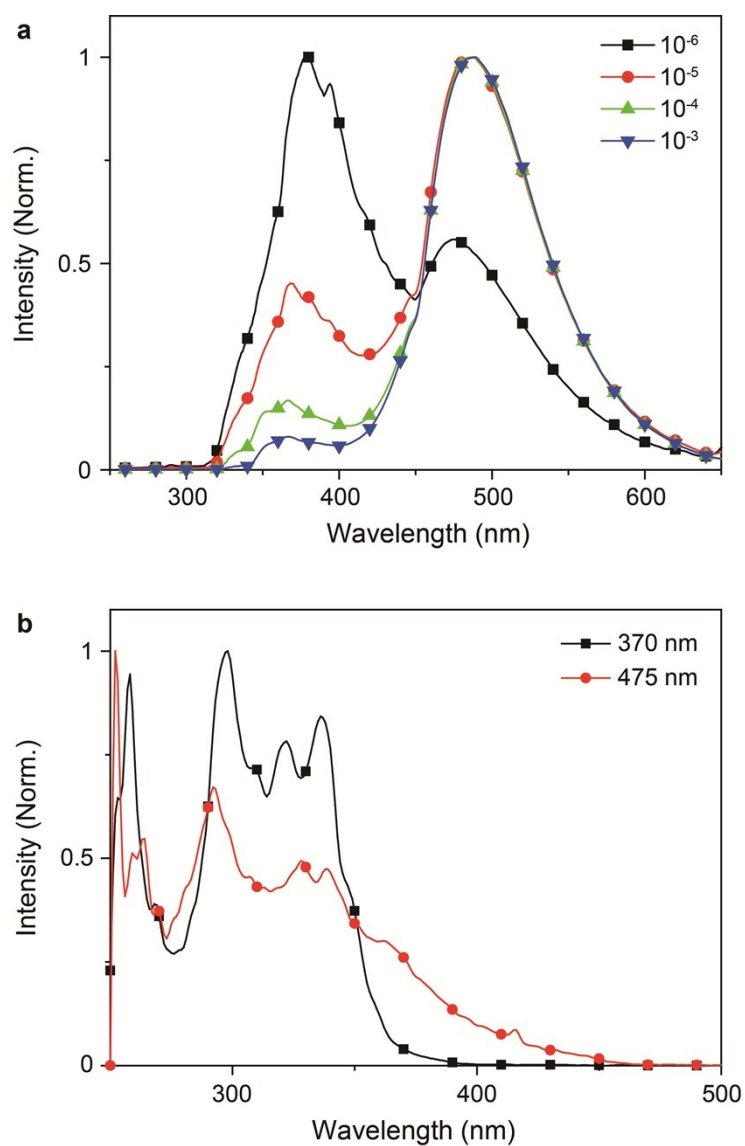

**Figure S2.** a) Emission spectra of **TPTZ** in dichloromethane with different concentrations ( $10^{-3}$ - $10^{-6}$  mol L $^{-1}$ ); b) excitation spectra of two emissions at 370 and 475 nm for **TPTZ** in dichloromethane ( $10^{-6}$  mol L $^{-1}$ ).

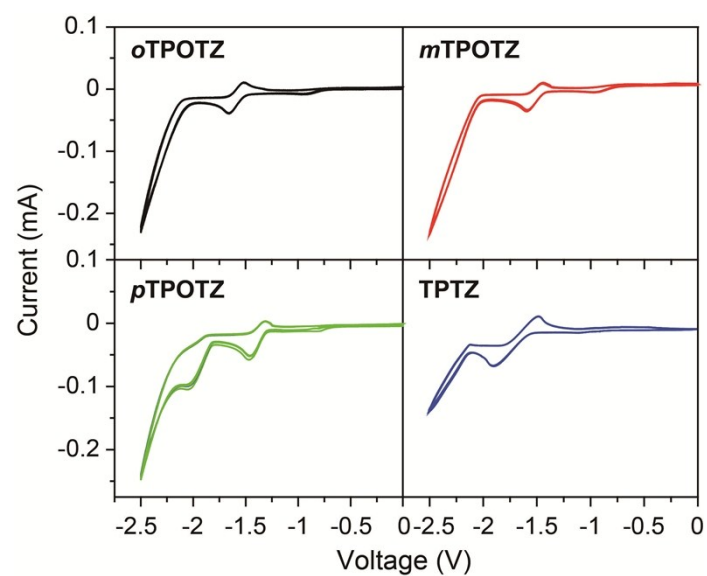

**Figure S3.** Reduction voltammograms of *x*TPOTZ and TPTZ for 10 circles measured in THF with tetra-*n*-butylammonium hexafluorophosphate as supporting electrolyte (0.1 mol L<sup>-1</sup>) at the scanning rate of 100 mV S<sup>-1</sup>.
